# Supplementary material for: QTL Mapping of Agronomic and Economic Traits for Four F2 Populations of Upland Cotton
Source: Research Square preprint supplement (doi:10.21203/rs.3.rs-21705/v4), 2020-12-04
Supplement: Supplementary file 1 [file 43157650c5a664f6c9321b42.xlsx]

## Sheet: Table1
Table 1 Phenotypic variation of 8 traits in four F2 Populations
Populaton	Traits	P1	P2	F2 populations
				Minimum	Maximum	Mean	SD	CV/%
4Su	PH/cm	100.037	86.5556	39	128	82.64	18.14	21.95
	BW/g	6.59373	6.54113	2.5	8.79	5.365	0.9695	18.07
	LP/%	42.8486	41.6168	33.33	51.38	41.25	2.552	6.19
	FL/mm	28.8	29.4	26.01	33.33	29.77	1.47	4.94
	FS/cN/tex	29.3	34.5667	23.42	38.71	30.09	2.837	9.43
	FU/%	85.8667	86.4667	79.7	89.4	85.34	1.667	1.95
	FE/%	6.85	6.8	6.2	7.3	6.85	0.1996	2.91
	MIC	5.27	5	2.21	5.49	4.135	0.7062	17.08
4J	PH/cm	100.037	89.7407	45	129	86.45	16.38	18.95
	BW/g	6.59373	7.05933	2.869	7.8	5.284	0.8914	16.87
	LP/%	42.8486	41.3658	32.37	47.84	39.85	2.375	5.96
	FL/mm	28.8	30.6667	27.24	34.47	31	1.592	5.14
	FS/cN/tex	29.3	33	24.21	40.08	31.86	2.656	8.34
	FU/%	85.8667	85.4333	79.2	90.6	86	1.579	1.84
	FE/%	6.85	6.95	6.6	7.7	7.165	0.1989	2.78
	MIC	5.27	5.26667	2.24	5.64	4.364	0.6094	13.96
SgJ	PH/cm	82.72	89.7407	45	124	80.78	13.65	16.9
	BW/g	6.2	7.05933	2.408	7.633	4.768	0.9392	19.7
	LP/%	43.63	41.3658	20.32	45.33	37.97	2.742	7.22
	FL/mm	29.33	30.6667	26.6	34.67	30.72	1.318	4.29
	FS/cN/tex	28.2	33	24.11	39.79	31.08	2.698	8.68
	FU/%	85.08	85.4333	78.6	89.8	85.27	2.221	2.61
	FE/%	6.7	6.95	6.1	7.5	6.948	0.2341	3.37
	MIC	5.15	5.26667	2.02	5.9	4.08	0.8978	22
Sg4	PH/cm	82.72	100.037	44	130	89.33	16.78	18.79
	BW/g	6.2	6.59373	3.11	7.3	5.263	0.8243	15.66
	LP/%	43.63	42.8486	35.13	51.57	43.53	3.474	7.98
	FL/mm	29.33	28.8	25.51	32.59	29.66	1.055	3.55
	FS/cN/tex	28.2	29.3	23.4	32.9	27.46	1.621	5.9
	FU/%	85.08	85.8667	81.5	90.5	86.09	1.373	1.59
	FE/%	6.7	6.85	6.2	7.5	6.86	0.2022	2.95
	MIC	5.15	5.27	2.81	5.97	4.695	0.6513	13.87
Note: a: The P1 of 4Su, 4J, SgJ and Sg4 population is 4133B, 4133B, SGK9708 and SGK9708, respectively; b: The P2 of 4Su, 4J, SgJ and Sg4 population is Suyuan04-3, J02-247, J02-247 and 4133B, respectively; c: SD,Standard Deviation; d: CV,Coefficient of variation.
